# Supplementary material for: Exploration of collective tactical variables in elite netball: An analysis of team and sub-group positioning behaviours
Source: PLOS journal article supplement (doi:10.1371/journal.pone.0295787), 2024-02-26
Supplement: S8 (10.1371/journal.pone.0295787.s008) [file journal.pone.0295787.s008]

**S6 Table. Correlations between collective tactical variables for the defender sub-group on defence.** Data shown are the range of the three correlations (mean, standard deviation and entropy). The variables have been ordered and outlined to show clusters with generally higher correlations between variables within the clusters than between the clusters.

| Variable                     | 1                | 2                | 3                | 4                | 5               | 6               | 7               | 8                | 9                | 10               |
|------------------------------|------------------|------------------|------------------|------------------|-----------------|-----------------|-----------------|------------------|------------------|------------------|
| 1. Stretch index             |                  | 1.0, .98, .97    | .90, .80, .88    | .90, .78, .86    | .84, .69, .76   | .50, .42, .54   | .51, .41, .60   | -.20, -.09, -.40 | .75, .49, .53    | .01, .21, .44    |
| 2. Inter-player distance     | 1.0, .98, .97    |                  | .90, .78, .86    | .90, .80, .88    | .84, .70, .77   | .50, .41, .54   | .50, .40, .60   | -.20, -.08, -.40 | .77, .47, .52    | .01, .20, .42    |
| 3. Stretch indexlongitudinal | .90, .80, .88    | .90, .78, .86    |                  | .99, .96, .93    | .69, .51, .65   | .13, .30, .46   | .14, .29, .52   | -.50, -.15, -.48 | .76, .54, .59    | .00, .19, .41    |
| 4. Length                    | .90, .78, .86    | .90, .80, .88    | .99, .96, .93    |                  | .68, .51, .65   | .12, .28, .50   | .13, .27, .54   | -.52, -.16, -.49 | .77, .50, .56    | .00, .17, .38    |
| 5. Surface area              | .84, .69, .76    | .84, .70, .77    | .69, .51, .65    | .68, .51, .65    |                 | .63, .49, .59   | .63, .47, .63   | .08, -.06, -.31  | .64, .36, .45    | -.01, .11, .40   |
| 6. Width                     | .50, .42, .54    | .50, .41, .54    | .13, .30, .46    | .12, .28, .50    | .63, .49, .59   |                 | .99, .97, .92   | .64, -.24, -.47  | .19, .28, .33    | .01, .32, .43    |
| 7. Stretch indexlateral      | .51, .41, .60    | .50, .40, .60    | .14, .29, .52    | .13, .27, .54    | .63, .47, .63   | .99, .97, .92   |                 | .63, -.25, -.49  | .20, .27, .37    | .00, .33, .48    |
| 8. Width per lengthratio     | -.20, -.09, -.40 | -.20, -.08, -.40 | -.50, -.15, -.48 | -.52, -.16, -.49 | .08, -.06, -.31 | .64, -.24, -.47 | .63, -.25, -.49 |                  | -.29, -.07, -.38 | -.03, -.13, -.30 |
| 9. Centroid longitudinal     | .75, .49, .53    | .77, .47, .52    | .76, .54, .59    | .77, .50, .56    | .64, .36, .45   | .19, .28, .33   | .20, .27, .37   | -.29, -.07, -.38 |                  | .02, .26, .35    |
| 10. Centroid lateral         | .01, .21, .44    | .01, .20, .42    | .00, .19, .41    | .00, .17, .38    | -.01, .11, .40  | .01, .32, .43   | .00, .33, .48   | -.03, -.13, -.30 | .02, .26, .35    |                  |

Uncertainty (90% compatibility limits):  $\sim \pm 0.1$  to  $\sim \pm 0.01$  for correlations of 0.00 to 0.95 respectively assuming a sample size of  $\sim 300$ .
