# Supplementary material for: Exploration of collective tactical variables in elite netball: An analysis of team and sub-group positioning behaviours
Source: PLOS journal article supplement (doi:10.1371/journal.pone.0295787), 2024-02-26
Supplement: S17 (10.1371/journal.pone.0295787.s017) [file journal.pone.0295787.s017]

**S15 Table. Effect of two SD of possession length (factor increases of 2.4 on attack and 2.7 on defence) on collective tactical variables for the team on attack and defence.** With the exception of the mean centroid longitudinal and lateral, the statistics were derived via log-transformation, hence data are the predicted changes (% ,  $\pm 90\%$  compatibility limits) and decisions about the magnitude of the changes.

| Variables                      | Attack            | Decision                         | Defence           | Decision                         |
|--------------------------------|-------------------|----------------------------------|-------------------|----------------------------------|
| <b>Mean</b>                    |                   |                                  |                   |                                  |
| Stretch index(m)               | 3.0, $\pm 1.3$ %  | <b>small</b> <sup>↑**</sup>      | 2.4, $\pm 1.7$ %  | <b>small</b> <sup>↑*0</sup>      |
| Inter-player distance (m)      | 2.0, $\pm 1.1$ %  | <b>small</b> <sup>↑*0</sup>      | 2.7, $\pm 1.6$ %  | <b>small</b> <sup>↑**</sup>      |
| Stretch indexlongitudinal (m)  | 3.3, $\pm 1.7$ %  | <b>small</b> <sup>↑**</sup>      | 2.2, $\pm 2.1$ %  | <b>trivial</b> <sup>↑0*</sup>    |
| Length (m)                     | 0.90, $\pm 1.2$ % | <b>trivial</b> <sup>00</sup>     | 3.4, $\pm 1.5$ %  | <b>small</b> <sup>↑***</sup>     |
| Width (m)                      | 3.0, $\pm 2.6$ %  | <b>trivial</b> <sup>↑0*</sup>    | 4.7, $\pm 3.0$ %  | <b>small</b> <sup>↑**</sup>      |
| Stretch indexlateral (m)       | 3.4, $\pm 2.7$ %  | <b>small</b> <sup>↑*0</sup>      | 5.5, $\pm 3.2$ %  | <b>small</b> <sup>↑**</sup>      |
| Width per length ratio (m)     | 0.10, $\pm 3.4$ % | <b>trivial</b> <sup>000</sup>    | 1.8, $\pm 3.8$ %  | <b>trivial</b> <sup>00</sup>     |
| Surface area (m <sup>2</sup> ) | 2.8, $\pm 2.7$ %  | <b>trivial</b> <sup>↑0*</sup>    | 6.7, $\pm 3.2$ %  | <b>small</b> <sup>↑***</sup>     |
| Centroid longitudinal (m)      | 0.57, $\pm 0.22$  | <b>small</b> <sup>↑**</sup>      | -0.71, $\pm 0.30$ | <b>small</b> <sup>↓****</sup>    |
| Centroid lateral (m)           | 0.07, $\pm 0.17$  | <b>trivial</b> <sup>00</sup>     | 0.19, $\pm 0.17$  | <b>trivial</b> <sup>↑0*</sup>    |
| <b>Variability</b>             |                   |                                  |                   |                                  |
| Stretch index(m)               | 29, $\pm 8.5$ %   | <b>moderate</b> <sup>↑****</sup> | 28, $\pm 9.8$ %   | <b>moderate</b> <sup>↑****</sup> |
| Inter-player distance (m)      | 27, $\pm 7.7$ %   | <b>small</b> <sup>↑****</sup>    | 28, $\pm 9.9$ %   | <b>moderate</b> <sup>↑****</sup> |
| Stretch indexlongitudinal (m)  | 28, $\pm 7.8$ %   | <b>moderate</b> <sup>↑****</sup> | 28, $\pm 9.5$ %   | <b>moderate</b> <sup>↑****</sup> |
| Length (m)                     | 21, $\pm 6.9$ %   | <b>small</b> <sup>↑****</sup>    | 26, $\pm 10$ %    | <b>small</b> <sup>↑****</sup>    |
| Width (m)                      | 22, $\pm 6.9$ %   | <b>small</b> <sup>↑****</sup>    | 13, $\pm 7.3$ %   | <b>small</b> <sup>↑**</sup>      |
| Width per length ratio (m)     | -16, $\pm 7.0$ %  | <b>small</b> <sup>↓**</sup>      | -7.5, $\pm 8.7$ % | <b>trivial</b> <sup>↓0*</sup>    |
| Stretch indexlateral (m)       | 17, $\pm 6.9$ %   | <b>small</b> <sup>↑***</sup>     | 14, $\pm 6.9$ %   | <b>small</b> <sup>↑***</sup>     |
| Surface area (m <sup>2</sup> ) | 12, $\pm 6.1$ %   | <b>small</b> <sup>↑**</sup>      | 16, $\pm 7$ %     | <b>small</b> <sup>↑***</sup>     |
| Centroid longitudinal (m)      | 20, $\pm 8.4$ %   | <b>small</b> <sup>↑***</sup>     | 33, $\pm 11$ %    | <b>moderate</b> <sup>↑****</sup> |
| Centroid lateral (m)           | 31, $\pm 9.3$ %   | <b>small</b> <sup>↑****</sup>    | 38, $\pm 12$ %    | <b>moderate</b> <sup>↑****</sup> |
| <b>Irregularity</b>            |                   |                                  |                   |                                  |
| Stretch index                  | -51, $\pm 3.9$ %  | <b>large</b> <sup>↓****</sup>    | -52, $\pm 4.9$ %  | <b>large</b> <sup>↓****</sup>    |
| Inter-player distance          | -47, $\pm 4.2$ %  | <b>moderate</b> <sup>↓****</sup> | -53, $\pm 4.4$ %  | <b>large</b> <sup>↓****</sup>    |
| Stretch indexlongitudinal      | -52, $\pm 3.9$ %  | <b>large</b> <sup>↓****</sup>    | -55, $\pm 4.4$ %  | <b>large</b> <sup>↓****</sup>    |
| Length                         | -48, $\pm 4.1$ %  | <b>large</b> <sup>↓****</sup>    | -52, $\pm 4.7$ %  | <b>large</b> <sup>↓****</sup>    |
| Width                          | -42, $\pm 3.3$ %  | <b>large</b> <sup>↓****</sup>    | -39, $\pm 4.2$ %  | <b>large</b> <sup>↓****</sup>    |
| Stretch indexlateral           | -42, $\pm 3.4$ %  | <b>large</b> <sup>↓****</sup>    | -40, $\pm 3.8$ %  | <b>large</b> <sup>↓****</sup>    |
| Width per length ratio         | -44, $\pm 4.3$ %  | <b>large</b> <sup>↓****</sup>    | -45, $\pm 4.1$ %  | <b>large</b> <sup>↓****</sup>    |
| Surface area                   | -40, $\pm 3.2$ %  | <b>large</b> <sup>↓****</sup>    | -40, $\pm 4.0$ %  | <b>large</b> <sup>↓****</sup>    |
| Centroid longitudinal          | -47, $\pm 5.7$ %  | <b>moderate</b> <sup>↓****</sup> | -53, $\pm 6.4$ %  | <b>moderate</b> <sup>↓****</sup> |
| Centroid lateral               | -46, $\pm 4.2$ %  | <b>large</b> <sup>↓****</sup>    | -55, $\pm 3.7$ %  | <b>large</b> <sup>↓****</sup>    |

↑, increase; ↓, decrease.

Magnitudes are based on the following scale for standardized changes in the mean: <0.2, trivial; 0.2-0.6, small; 0.6-1.2, moderate; 1.2-2.0, large; 2.0-4.0, very large; >4.0 extremely large

Reference-Bayesian likelihoods of substantial change: \*possibly; \*\*likely; \*\*\*very likely, \*\*\*\*most likely.

\*\*\* and \*\*\*\* indicate rejection of the non-superiority or non-inferiority hypothesis ( $p_{N-}$  or  $p_{N+}$  <0.05 and <0.005 respectively).

Reference-Bayesian likelihoods of trivial change: <sup>0</sup>possibly; <sup>00</sup>likely; <sup>000</sup>very likely.

Likelihoods are not shown for effects with inadequate precision at the 90% level (failure to reject any hypotheses:  $p > 0.05$ ).

Effects in **bold** have adequate precision at the 99% level ( $p < 0.005$ ).
