# Supplementary material for: Exploration of collective tactical variables in elite netball: An analysis of team and sub-group positioning behaviours
Source: PLOS journal article supplement (doi:10.1371/journal.pone.0295787), 2024-02-26
Supplement: S18 (10.1371/journal.pone.0295787.s018) [file journal.pone.0295787.s018]

**S16 Table. Effect of two SD of possession length (factor increases of 2.4 on attack and 2.7 on defence) on collective tactical variables for the forward's sub-group on attack and defence.** With the exception of the mean centroid longitudinal and lateral, the statistics were derived via log-transformation, hence data are the predicted changes (% ,  $\pm 90\%$  compatibility limits) and decisions about the magnitude of the changes.

| Variables                      | Attack             | Decision                                  | Defence           | Decision                                |
|--------------------------------|--------------------|-------------------------------------------|-------------------|-----------------------------------------|
| <b>Mean</b>                    |                    |                                           |                   |                                         |
| Stretch index(m)               | -2.6, $\pm 3.2$ %  | <b>trivial</b> <sup>0</sup>               | 13, $\pm 4.3$ %   | <b>moderate</b> $\uparrow$ ****         |
| Inter-player distance (m)      | -3.0, $\pm 3.1$ %  | <b>trivial</b> $\downarrow$ <sup>0*</sup> | 12, $\pm 4.2$ %   | <b>small</b> $\uparrow$ ****            |
| Stretch index longitudinal (m) | -2.9, $\pm 4.8$ %  | <b>trivial</b> <sup>0</sup>               | 16, $\pm 5.7$ %   | <b>small</b> $\uparrow$ ****            |
| Length (m)                     | -3.6, $\pm 4.7$ %  | <b>trivial</b> $\downarrow$ <sup>0*</sup> | 13, $\pm 5.3$ %   | <b>small</b> $\uparrow$ ***             |
| Surface area (m <sup>2</sup> ) | -4.7, $\pm 7.2$ %  | <b>trivial</b> <sup>0</sup>               | 23, $\pm 11$ %    | <b>small</b> $\uparrow$ ***             |
| Width (m)                      | 0.00, $\pm 4.4$ %  | trivial <sup>0</sup>                      | 3.6, $\pm 4.5$ %  | <b>trivial</b> $\uparrow$ <sup>0*</sup> |
| Stretch index lateral (m)      | -0.10, $\pm 4.2$ % | trivial <sup>0</sup>                      | 3.4, $\pm 4.6$ %  | <b>trivial</b> $\uparrow$ <sup>0*</sup> |
| Width per length ratio (m)     | -3.8, $\pm 8.4$ %  | <b>trivial</b> <sup>00</sup>              | -13, $\pm 6.6$ %  | <b>small</b> $\downarrow$ **            |
| Centroid longitudinal (m)      | 0.58, $\pm 0.33$   | <b>small</b> $\uparrow$ <sup>*0</sup>     | -0.66, $\pm 0.37$ | <b>small</b> $\downarrow$ **            |
| Centroid lateral (m)           | 0.11, $\pm 0.22$   | <b>trivial</b> <sup>00</sup>              | 0.39, $\pm 0.20$  | <b>small</b> $\uparrow$ **              |
| <b>Variability</b>             |                    |                                           |                   |                                         |
| Stretch index(m)               | 28, $\pm 7.9$ %    | <b>moderate</b> $\uparrow$ ****           | 26, $\pm 8.4$ %   | <b>moderate</b> $\uparrow$ ****         |
| Inter-player distance (m)      | 26, $\pm 7.8$ %    | <b>moderate</b> $\uparrow$ ****           | 23, $\pm 8.3$ %   | <b>small</b> $\uparrow$ ****            |
| Stretch index longitudinal (m) | 27, $\pm 7.9$ %    | <b>moderate</b> $\uparrow$ ****           | 27, $\pm 8.3$ %   | <b>moderate</b> $\uparrow$ ****         |
| Length (m)                     | 25, $\pm 7.7$ %    | <b>small</b> $\uparrow$ ****              | 23, $\pm 8.2$ %   | <b>small</b> $\uparrow$ ****            |
| Surface area (m <sup>2</sup> ) | 14, $\pm 8.7$ %    | <b>small</b> $\uparrow$ **                | 34, $\pm 11$ %    | <b>moderate</b> $\uparrow$ ****         |
| Width (m)                      | 18, $\pm 6.5$ %    | <b>small</b> $\uparrow$ ****              | 26, $\pm 8.7$ %   | <b>moderate</b> $\uparrow$ ****         |
| Stretch index lateral (m)      | 17, $\pm 6.2$ %    | <b>small</b> $\uparrow$ ***               | 26, $\pm 9.1$ %   | <b>moderate</b> $\uparrow$ ****         |
| Width per length ratio (m)     | -26, $\pm 11$ %    | <b>small</b> $\downarrow$ **              | -30, $\pm 10$ %   | <b>small</b> $\downarrow$ ***           |
| Centroid longitudinal (m)      | 27, $\pm 9.1$ %    | <b>small</b> $\uparrow$ ****              | 27, $\pm 8.9$ %   | <b>small</b> $\uparrow$ ****            |
| Centroid lateral (m)           | 26, $\pm 8.8$ %    | <b>small</b> $\uparrow$ ****              | 54, $\pm 16$ %    | <b>moderate</b> $\uparrow$ ****         |
| <b>Irregularity</b>            |                    |                                           |                   |                                         |
| Stretch index                  | -48, $\pm 3.7$ %   | <b>large</b> $\downarrow$ ****            | -42, $\pm 6.4$ %  | <b>moderate</b> $\downarrow$ ****       |
| Inter-player distance          | -47, $\pm 3.7$ %   | <b>moderate</b> $\downarrow$ ****         | -45, $\pm 6.5$ %  | <b>moderate</b> $\downarrow$ ****       |
| Stretch index longitudinal     | -52, $\pm 3.5$ %   | <b>large</b> $\downarrow$ ****            | -48, $\pm 6.1$ %  | <b>moderate</b> $\downarrow$ ****       |
| Length                         | -50, $\pm 3.6$ %   | <b>large</b> $\downarrow$ ****            | -46, $\pm 5.8$ %  | <b>moderate</b> $\downarrow$ ****       |
| Surface area                   | -43, $\pm 3.8$ %   | <b>moderate</b> $\downarrow$ ****         | -42, $\pm 5.5$ %  | <b>moderate</b> $\downarrow$ ****       |
| Width                          | -35, $\pm 3.9$ %   | <b>moderate</b> $\downarrow$ ****         | -41, $\pm 4.6$ %  | <b>large</b> $\downarrow$ ****          |
| Stretch index lateral          | -35, $\pm 3.8$ %   | <b>moderate</b> $\downarrow$ ****         | -41, $\pm 4.4$ %  | <b>large</b> $\downarrow$ ****          |
| Width per length ratio         | -75, $\pm 18$ %    | <b>moderate</b> $\downarrow$ ****         | -90, $\pm 20$ %   | <b>moderate</b> $\downarrow$ ****       |
| Centroid longitudinal          | -49, $\pm 5.1$ %   | <b>moderate</b> $\downarrow$ ****         | -58, $\pm 4.9$ %  | <b>large</b> $\downarrow$ ****          |
| Centroid lateral               | -40, $\pm 4.4$ %   | <b>moderate</b> $\downarrow$ ****         | -56, $\pm 4.1$ %  | <b>large</b> $\downarrow$ ****          |

$\uparrow$ , increase;  $\downarrow$ , decrease.

Magnitudes are based on the following scale for standardized changes in the mean: <0.2, trivial; 0.2-0.6, small; 0.6-1.2, moderate; 1.2-2.0, large; 2.0-4.0, very large; >4.0 extremely large

Reference-Bayesian likelihoods of substantial change: \*possibly; \*\*likely; \*\*\*very likely, \*\*\*\*most likely.

\*\*\* and \*\*\*\* indicate rejection of the non-superiority or non-inferiority hypothesis ( $p_N$ - or  $p_{N+}$  <0.05 and <0.005 respectively).

Reference-Bayesian likelihoods of trivial change: <sup>0</sup>possibly.

Likelihoods are not shown for effects with inadequate precision at the 90% level (failure to reject any hypotheses;  $p > 0.05$ ).

Effects in **bold** have adequate precision at the 99% level ( $p < 0.005$ ).
